# Supplementary material
Source: MDPI journal article supplement (https://www.mdpi.com/2073-4468/11/2/40)
Supplement: s1 [file s1]

```

1  Supplementary Information
2  MARTINI Force Field Parameters for Compound X
3  [moleculetype]
4  ; molname      nrexcl
5    CPX          2
6
7  [atoms]
8  ; id  type  resnr  residue  atom  cgnr  charge
9      1   P5    1    CPX     P01    1     0
10     2   Na    1    CPX     N01    2     0
11     3   SP1    1    CPX     S01    3     0
12     4   SNa    1    CPX     S02    4     0
13     5   Nd     1    CPX     N02    5     0
14     6   SP2    1    CPX     S03    6     0
15     7   SP1    1    CPX     S04    7     0
16     8   SP1    1    CPX     S05    8     0
17     9   SN0    1    CPX     S06    9     0
18    10   SN0    1    CPX     S07   10     0
19
20  [bonds]
21  ; i j  funct  length  force.c.
22    1 2    1     0.382  15000
23    1 5    1     0.304  15000
24    5 6    1     0.280  15000
25
26  [constraints]
27  ; i j  funct  length
28    2 3    1     0.301
29    3 4    1     0.125
30    2 4    1     0.314
31    6 7    1     0.122
32    7 8    1     0.210
33    6 8    1     0.204
34    9 10   1     0.165
35    8 9    1     0.245
36
37  [angles]
38  ; i j k    funct  angle  force.c.

```

|    |                                |   |     |        |
|----|--------------------------------|---|-----|--------|
| 39 | 3 2 1                          | 2 | 180 | 125.0  |
| 40 | 4 2 1                          | 2 | 120 | 150.0  |
| 41 | 2 1 5                          | 2 | 95  | 125.0  |
| 42 | 1 5 6                          | 2 | 150 | 60.0   |
| 43 | 5 6 8                          | 2 | 130 | 100.0  |
| 44 | 5 6 7                          | 2 | 160 | 125.0  |
| 45 | 6 8 9                          | 2 | 150 | 250.0  |
| 46 | 7 8 9                          | 2 | 180 | 250.0  |
| 47 | 8 9 10                         | 2 | 180 | 1000.0 |
| 48 |                                |   |     |        |
| 49 | [dihedrals]                    |   |     |        |
| 50 | ; i j k l funct angle force.c. |   |     |        |
